# Supplementary material for: A CRISPR evolutionary arms race: structural insights into viral anti-CRISPR/Cas responses
Source: PubMed Central journal article supplement — Cell Res. 2016 Sep 2;26(10):1165–8. doi: 10.1038/cr.2016.103 (PMC5113301; doi:10.1038/cr.2016.103), 2016-09-02
Supplement: cr2016103x1.pdf [file cr2016103x1.pdf]

**Supplementary information, Table S1. Crystallographic Data collection and Refinement**

**Statistics**

|                                       | SeMet-AcrF3           | Native-AcrF3          |
|---------------------------------------|-----------------------|-----------------------|
| <b>Data collection</b>                |                       |                       |
| Beamline                              | SSRF BL-19U1          | SSRF BL-19U1          |
| Space group                           | <i>P6<sub>5</sub></i> | <i>P6<sub>5</sub></i> |
| Cell dimensions                       |                       |                       |
| a, b, c (Å)                           | 85.90, 85.90, 62.48   | 84.94, 84.94, 63.15   |
| $\alpha$ , $\beta$ , $\gamma$ (°)     | 90.00, 90.00, 120.00  | 90.00, 90.00, 120.00  |
| Resolution (Å)                        | 50-2.0<br>(2.07-2.0)* | 50-1.5<br>(1.55-1.5)* |
| R <sub>sym</sub>                      | 0.11 (0.49)           | 0.06 (0.40)           |
| I/ $\sigma$ I                         | 30.7 (4.2)            | 48.8 (3.4)            |
| Completeness (%)                      | 100 (100)             | 99.9 (99.5)           |
| Redundancy                            | 22.0 (11.0)           | 15.4 (7.1)            |
| <b>Refinement</b>                     |                       |                       |
| Resolution (Å)                        |                       | 1.5                   |
| No. reflections                       |                       | 69325                 |
| R <sub>work</sub> / R <sub>free</sub> |                       | 0.166/0.187           |
| No. atoms                             |                       |                       |
| protein                               |                       | 2154                  |
| Solvent                               |                       | 392                   |
| B-factors (Å <sup>2</sup> )           |                       |                       |
| Protein                               |                       | 32.88                 |
| Solvent                               |                       | 36.47                 |
| R.m.s. deviations                     |                       |                       |
| Bond length (Å)                       |                       | 0.006                 |
| Bond angles (°)                       |                       | 0.881                 |
| Ramachandran plot                     |                       |                       |
| Favored region                        |                       | 97.7                  |
| Allowed region                        |                       | 2.3                   |
| Outlier region                        |                       | 0                     |

\* Highest resolution shell is shown in parentheses.
